# Supplementary material for: Stochastic Appointment Scheduling in a Team Primary Care Practice with Two Flexible Nurses and Two Dedicated Providers
Source: Atypon-hosted journal article supplement (doi:10.1287/serv.2018.0219), 2018-09-01
Supplement: serv.2018.0219.sm1.pdf [file serv.2018.0219.sm1.pdf]

## Digital Companion Appendix A: TP Model without Patient Crossovers

The model without crossovers is identical for the nurse step, but lends itself to a much easier formulation of the provider step as the sequence of patients is fixed regardless of the scenario.

$$\begin{aligned}
 \text{Min.} \quad & \frac{1}{S} \left( \alpha \left[ \sum_k \sum_s \left( \left( z_{J_k,s}^{k,finish} - \sum_{k=1}^{J_k} \tau_{j,s}^{P_k} \right) \right) \right] \right. \\
 & + \beta \left[ \sum_s \sum_{i=1}^n (y_{i,s}^{start} - 15X_i) \right. \\
 & \left. \left. + \sum_s \left( \sum_k \sum_{j=1}^{J_k} (z_{j,s}^{k,start} - t_{j,s}^k) \right) \right] \right) \quad (1)
 \end{aligned}$$

$$\text{Subject to. } y_{i,s}^{start} = 0 \quad \forall s \in S, i = 1,2 \quad (2)$$

$$z_{0,s}^{k,finish} = 0 \quad \forall k \in K, s \in S \quad (3)$$

$$X_i = 0 \quad i = 1,2 \quad (4)$$

$$y_{3,s}^{start} \geq \min(y_{1,s}^{finish}, y_{2,s}^{finish}) \quad \forall s \in S \quad (5)$$

$$N_{3,s}^{max} \geq \max(y_{1,s}^{finish}, y_{2,s}^{finish}) \quad \forall s \in S \quad (6)$$

$$N_{i,s}^{max} \geq \max(N_{i-1,s}^{max}, y_{i-1,s}^{finish}) \quad \forall i \in 4..I, s \in S \quad (7)$$

$$y_{i,s}^{start} \geq \min(N_{i-1,s}^{max}, y_{i-1,s}^{finish}) \quad \forall i \in 4..I, s \in S \quad (8)$$

$$y_{i,s}^{finish} = y_{i,s}^{start} + \tau_{i,s}^N \quad \forall i \in I, s \in S \quad (9)$$

$$y_{i,s}^{start} \geq 15X_i \quad \forall i \in I, s \in S \quad (10)$$

$$t_{j,s}^k = y_{f[j,k],s}^{finish} \quad \forall k \in K, j \in J_k, s \in S \quad (11)$$

$$z_{j,s}^{k,start} \geq t_{j,s}^k \quad \forall k \in K, j \in J_k, s \in S \quad (12)$$

$$z_{j,s}^{k,finish} = z_{j,s}^{k,start} + \tau_{j,s}^{P_k} \quad \forall k \in K, j \in J_k, s \in S \quad (13)$$

$$z_{j,s}^{k,start} \geq z_{j-1,s}^{k,finish} \quad \forall k \in K, j \in J_k, s \in S \quad (14)$$

$$X \geq 0, INT; y^{start}, y^{finish}, z^{start}, z^{finish} \geq 0$$

## Digital Companion Appendix B: Computational Results for Lognormally Distributed Nurse and Provider Service Times

### B1. Computational Performance as Service Time Variance Increases

Optimality Gaps for Medium (8 patients per provider) and Large Instances (10 patients per provider) with Lognormally Distributed Service Times with and without Lower Bounds Created by Solving 100 Groups of 10-Scenario Problems

| Without Scenario-Groups Lower Bounds |                  |                  |                     |
|--------------------------------------|------------------|------------------|---------------------|
| Gaps                                 | Regular Variance | Doubled Variance | Quadrupled Variance |
| Medium Instances                     | 12.71%           | 10.64%           | 7.12%               |
| Large Instances                      | 22.41%           | 18.39%           | 11.15%              |
| With Scenario-Groups Lower Bounds    |                  |                  |                     |
| Gaps                                 | Regular Variance | Doubled Variance | Quadrupled Variance |
| Medium Instances                     | 3.81%            | 3.66%            | 3.44%               |
| Large Instances                      | 5.05%            | 5.14%            | 4.32%               |

### B2. Schedule Sensitivity to Service Time Variance and Idle vs. Wait Time Cost Ratio

The optimal schedules displayed below show 1) when idle time is prioritized with a cost ratio of 4, fewer empty slots are needed as variability increases, and 2) as a heavier weight is placed on wait time, with cost ratios of 2 and 1, more slack is added and variability does not affect the optimal schedule.

Schedules for Small Instances (5 patients per provider) with Lognormally Distributed Service Times for different Cost Ratios (4 (0.8:0.2 idle time/wait time), 2 (0.67:0.33 idle time/wait time) and 1 (0.5:0.5 idle time/wait time)) and for different Service Time Variance

#### Cost Ratio of 4

| Time | Schedule for Regular Variance |       | Schedule for Doubled Variance |       | Schedule for Quadrupled Variance |       |
|------|-------------------------------|-------|-------------------------------|-------|----------------------------------|-------|
|      | PCP 1                         | PCP 2 | PCP 1                         | PCP 2 | PCP 1                            | PCP 2 |
| 0:00 | █                             | █     | █                             | █     | █                                | █     |
| 0:15 | █                             | █     | █                             | █     | █                                | █     |
| 0:30 | █                             | █     | █                             | █     | █                                | █     |
| 0:45 | █                             | █     | █                             | █     | █                                | █     |

|      |  |  |  |  |  |  |  |
|------|--|--|--|--|--|--|--|
| 1:00 |  |  |  |  |  |  |  |
| 1:15 |  |  |  |  |  |  |  |
| 1:30 |  |  |  |  |  |  |  |

**Cost Ratio of 2**

| Time | Schedule for Regular Variance |       | Schedule for Doubled Variance |       | Schedule for Quadrupled Variance |       |
|------|-------------------------------|-------|-------------------------------|-------|----------------------------------|-------|
|      | PCP 1                         | PCP 2 | PCP 1                         | PCP 2 | PCP 1                            | PCP 2 |
| 0:00 |                               |       |                               |       |                                  |       |
| 0:15 |                               |       |                               |       |                                  |       |
| 0:30 |                               |       |                               |       |                                  |       |
| 0:45 |                               |       |                               |       |                                  |       |
| 1:00 |                               |       |                               |       |                                  |       |
| 1:15 |                               |       |                               |       |                                  |       |
| 1:30 |                               |       |                               |       |                                  |       |

**Cost Ratio of 1**

| Time | Schedule for Regular Variance |       | Schedule for Doubled Variance |       | Schedule for Quadrupled Variance |       |
|------|-------------------------------|-------|-------------------------------|-------|----------------------------------|-------|
|      | PCP 1                         | PCP 2 | PCP 1                         | PCP 2 | PCP 1                            | PCP 2 |
| 0:00 |                               |       |                               |       |                                  |       |
| 0:15 |                               |       |                               |       |                                  |       |
| 0:30 |                               |       |                               |       |                                  |       |
| 0:45 |                               |       |                               |       |                                  |       |
| 1:00 |                               |       |                               |       |                                  |       |
| 1:15 |                               |       |                               |       |                                  |       |
| 1:30 |                               |       |                               |       |                                  |       |
| 1:45 |                               |       |                               |       |                                  |       |
| 2:00 |                               |       |                               |       |                                  |       |

**Wait time vs. Idle Time(min) for Small Instances (5 patients per provider) with Lognormally Distributed Service Times for different Cost Ratios (4 (0.8:0.2 idle time/wait time), 2 (0.67:0.33 idle time/wait time) and 1 (0.5:0.5 idle time/wait time))**

|      | CR1                        |        |                 | CR2                        |        |                 | CR4                        |        |                 |
|------|----------------------------|--------|-----------------|----------------------------|--------|-----------------|----------------------------|--------|-----------------|
|      | Mean                       | Median | 90th Percentile | Mean                       | Median | 90th Percentile | Mean                       | Median | 90th Percentile |
|      | Regular Variance           |        |                 |                            |        |                 |                            |        |                 |
| Wait | 3.69                       | 1.7    | 9.3             | 9.44                       | 6.4    | 21.2            | 10.35                      | 7.2    | 23.52           |
| Idle | 56.39                      | 55.5   | 78              | 36.08                      | 34.5   | 54.5            | 34.92                      | 33.5   | 53.55           |
|      | Objective Function: 74.84  |        |                 | Objective Function: 79.56  |        |                 | Objective Function: 76.57  |        |                 |
|      | Doubled Variance           |        |                 |                            |        |                 |                            |        |                 |
| Wait | 5.59                       | 2.7    | 14.31           | 10.05                      | 6.1    | 23.92           | 14.41                      | 9.6    | 32.62           |
| Idle | 61.12                      | 60.25  | 89.5            | 46.06                      | 43     | 73              | 38.32                      | 34.5   | 65              |
|      | Objective Function: 89.07  |        |                 | Objective Function: 94.90  |        |                 | Objective Function: 90.14  |        |                 |
|      | Quadrupled Variance        |        |                 |                            |        |                 |                            |        |                 |
| Wait | 7.98                       | 3.4    | 20.51           | 13.3                       | 7.25   | 33.03           | 17.79                      | 10.7   | 43.22           |
| Idle | 66.9                       | 64     | 103.05          | 49.93                      | 44.5   | 85.1            | 43.23                      | 36.5   | 80.05           |
|      | Objective Function: 106.81 |        |                 | Objective Function: 110.89 |        |                 | Objective Function: 104.75 |        |                 |

### B3. Effect of Crossovers

**Wait time vs. Idle Time (min) for Small Instances (5 patients per provider) with Lognormally Distributed Service Times for Models with and without Crossovers for different Cost Ratios**

#### **Cost Ratio of 4 (0.8:0.2 weights on idle time/wait time)**

|      | No crossover               |        |                 | Crossover                  |        |                 |
|------|----------------------------|--------|-----------------|----------------------------|--------|-----------------|
|      | Mean                       | Median | 90th Percentile | Mean                       | Median | 90th Percentile |
|      | Regular Variance           |        |                 |                            |        |                 |
| Wait | 10.56                      | 7.1    | 24.21           | 10.35                      | 7.2    | 23.52           |
| Idle | 37.28                      | 35.5   | 58              | 34.92                      | 33.5   | 53.55           |
|      | Objective Function: 80.77  |        |                 | Objective Function: 76.57  |        |                 |
|      | Doubled Variance           |        |                 |                            |        |                 |
| Wait | 17.07                      | 11.35  | 39.62           | 14.41                      | 9.6    | 32.62           |
| Idle | 41.08                      | 37     | 69.5            | 38.32                      | 34.5   | 65              |
|      | Objective Function: 99.87  |        |                 | Objective Function: 90.13  |        |                 |
|      | Quadrupled Variance        |        |                 |                            |        |                 |
| Wait | 21.75                      | 13.65  | 50.55           | 17.79                      | 10.7   | 43.22           |
| Idle | 48.95                      | 41     | 89              | 43.23                      | 36.5   | 80.05           |
|      | Objective Function: 121.82 |        |                 | Objective Function: 104.75 |        |                 |

#### **Cost Ratio of 1 (0.5:0.5 weights on idle time/wait time)**

|      | No crossover     |        |                 | Crossover |        |                 |
|------|------------------|--------|-----------------|-----------|--------|-----------------|
|      | Mean             | Median | 90th Percentile | Mean      | Median | 90th Percentile |
|      | Regular Variance |        |                 |           |        |                 |
| Wait | 4.46             | 2      | 11.41           | 3.69      | 1.7    | 9.3             |
| Idle | 57.02            | 56.5   | 79              | 56.39     | 55.5   | 78              |

|      |                            |     |        |                            |       |        |
|------|----------------------------|-----|--------|----------------------------|-------|--------|
|      | Objective Function: 79.32  |     |        | Objective Function: 74.84  |       |        |
|      | Doubled Variance           |     |        |                            |       |        |
| Wait | 7.51                       | 3.5 | 19.13  | 5.59                       | 2.7   | 14.31  |
| Idle | 62.83                      | 61  | 92     | 61.12                      | 60.25 | 89.5   |
|      | Objective Function: 100.38 |     |        | Objective Function: 89.07  |       |        |
|      | Quadrupled Variance        |     |        |                            |       |        |
| Wait | 12.08                      | 5.4 | 31.21  | 7.98                       | 3.4   | 20.51  |
| Idle | 70.04                      | 66  | 108.05 | 66.9                       | 64    | 103.05 |
|      | Objective Function: 130.44 |     |        | Objective Function: 106.81 |       |        |

#### Percentages of Crossovers for Instances with Lognormally Distributed Service Times

| Instance                             | Crossover Percentage |
|--------------------------------------|----------------------|
| Small instance, regular variance     | 5.35%                |
| Small instance, doubled variance     | 10.34%               |
| Small instance, quadrupled variance  | 13.40%               |
| Medium instance, regular variance    | 7.49%                |
| Medium instance, doubled variance    | 12.39%               |
| Medium instance, quadrupled variance | 13.70%               |
| Large instance, regular variance     | 8.95%                |
| Large instance, doubled variance     | 18.64%               |
| Large instance, quadrupled variance  | 15.13%               |

#### B4. Effect of Decreasing the Length Appointment Time slots

Our model considers 15min appointment slots; that is, patients will only be given appointments at the quarters of the hour (e.g. 8AM, 8:15AM, 8:30AM, etc.). Below, we first compare the performance of these 15min slot appointments to 5min slots (e.g. 8AM, 8:05AM, 8:10AM, etc.) As an extreme case, we also consider the continuous appointment problem, where patients can be given appointments at any time (e.g. 8:03AM).

##### Wait Time vs. Idle Time for Small Instance (5 patients per provider) with Lognormally Distributed Service Times with 5-minute vs. 15-minute Appointment Intervals

|      | 5 minutes Appointment     |        |                 | 15 minutes Appointment    |        |                 |
|------|---------------------------|--------|-----------------|---------------------------|--------|-----------------|
|      | Mean                      | Median | 90th Percentile | Mean                      | Median | 90th Percentile |
| Wait | 9.91                      | 6.6    | 23.3            | 10.35                     | 7.2    | 23.52           |
| Idle | 34.53                     | 33     | 53.5            | 34.92                     | 33.5   | 53.55           |
|      | Objective Function: 75.07 |        |                 | Objective Function: 76.57 |        |                 |

##### Wait Time vs. Idle Time for Small Instances (5 patients per provider) with Lognormally Distributed Service Times with Continuous vs. 15-minute Appointment Intervals

|      | Continuous Appointment     |        |                 | 15 minutes Appointment     |        |                 |
|------|----------------------------|--------|-----------------|----------------------------|--------|-----------------|
|      | Mean                       | Median | 90th Percentile | Mean                       | Median | 90th Percentile |
|      | Regular Variance           |        |                 |                            |        |                 |
| Wait | 10.45                      | 7      | 24.4            | 10.35                      | 7.2    | 23.52           |
| Idle | 33.68                      | 32     | 53              | 34.92                      | 33.5   | 53.55           |
|      | Objective Function: 74.8   |        |                 | Objective Function: 76.57  |        |                 |
|      | Doubled Variance           |        |                 |                            |        |                 |
| Wait | 13                         | 8.2    | 31.93           | 14.41                      | 9.6    | 32.62           |
| Idle | 39.15                      | 35.5   | 64.55           | 38.32                      | 34.5   | 65              |
|      | Objective Function: 88.64  |        |                 | Objective Function: 90.13  |        |                 |
|      | Quadrupled Variance        |        |                 |                            |        |                 |
| Wait | 15.79                      | 9.05   | 39.81           | 17.79                      | 10.7   | 43.22           |
| Idle | 44.86                      | 38     | 82              | 43.23                      | 36.5   | 80.05           |
|      | Objective Function: 103.36 |        |                 | Objective Function: 104.75 |        |                 |
